# Supplementary material for: Temporal and Spatial Evolution of Brain Network Topology during the First Two Years of Life
Source: PLoS One. 2011 Sep 23;6(9):e25278. doi: 10.1371/journal.pone.0025278 (PMC3179501; doi:10.1371/journal.pone.0025278)
Supplement: Table S3 — Regional Development of Local Efficiency (LE). (DOCX) [file pone.0025278.s017.docx]

| **Table S3 Regional Development of Local Efficiency (LE)** | | |
| --- | --- | --- |
|  | **From neonates to 1yr olds** | **From 1yr to 2yr olds** |
| **Increase** | | Hpcmp-L | Pallidum-R | | --- | --- | | Amygdala-L | Thalamus-R | | Calcarine-R | Thalamus-L | | Calcarine-L | Heschl-L | | Lingual-L | **Temp-P-S-L** | | **Fusiform-R** | **Temp-M-R** | | ParaC-L | **Temp-P-M-R** | | Putamen-R | **Temp-P-M-L** | | Putamen-L | **Temp-I-R** | | | ParaHpcmp-L | | --- | | Lingual-R | | Occpt-M-R | |
| **Decrease** | | Frt-M-R | **SMA-R** | | --- | --- | | **Frt-M-L** | SMA-L | | Frt-M-Ob-R | Frt-S-M-R | | **Frt-I-Op-R** | **Insula-R** | | **Frt-I-Op-L** | **Cg-A-L** | | **Frt-I-T-L** |  | | | Olfactory-R | | --- | | Cg-M-L | | PosC-L | | Caudate-R | |

Brain regions highlighted in green indicate regional changes of LE accompanied by similar changes (either increase or decrease) in degree as shown in Table. S6.
