# Supplementary material for: Temporal and Spatial Evolution of Brain Network Topology during the First Two Years of Life
Source: PLoS One. 2011 Sep 23;6(9):e25278. doi: 10.1371/journal.pone.0025278 (PMC3179501; doi:10.1371/journal.pone.0025278)
Supplement: Table S4 — Regional Development of Global Efficiency (GE). (DOCX) [file pone.0025278.s018.docx]

| **Table S4 Regional Development of Global Efficiency (GE)** | | |
| --- | --- | --- |
|  | **From neonates to 1yr olds** | **From 1yr to 2yr olds** |
| **Increase** | | PreC-L | Occpt-M-L | | --- | --- | | Frt-S-Ob-L | Fusiform-R | | Frt-I-Ob-L | Fusiform-L | | Rolandic-R | PosC-L | | Rolandic-L | Prt-I-R | | **SMA-R** | Prt-I-L | | SMA-L | SMargl-R | | Olfactory-R | SMargl-L | | Olfactory-L | Angular-R | | Frt-M-Ob-R | Precuneus-R | | Rectus-R | Heschl-L | | Rectus-L | Temp-S-R | | Cg-M-R | Temp-S-L | | Cg-M-L | Temp-P-S-L | | Cg-P-R | Temp-M-R | | Cg-P-L | Temp-M-L | | Hpcmp-R | Temp-P-M-R | | Hpcmp-L | Temp-P-M-L | | ParaHpcmp-R | Temp-I-R | | ParaHpcmp-L | Temp-I-L | | Amygdala-L |  | | Occpt-S-L |  | | | **Cg-P-R** | | --- | | **Cg-P-L** | | Temp-I-R | |
| **Decrease** | | **Caudate-R** | | --- | | **Caudate-L** | | Putamen-L | | | **PreC-R** | | --- | | Frt-I-Ob-L | | **PosC-R** | | **PosC-L** | | **Caudate-R** | | **Caudate-L** | | Heschl-R | |

The brain regions highlighted in red indicate a concurrent increase of GE/MD/degree while brain regions with concurrent decreases of GE/MD/degree are marked in blue.
