# Supplementary material for: Temporal and Spatial Evolution of Brain Network Topology during the First Two Years of Life
Source: PLoS One. 2011 Sep 23;6(9):e25278. doi: 10.1371/journal.pone.0025278 (PMC3179501; doi:10.1371/journal.pone.0025278)
Supplement: Table S5 — Regional Development of Maximum Connection Distance (MD). (DOCX) [file pone.0025278.s019.docx]

| **Table S5 Regional Development of Maximum Connection Distance (MD)** | | |
| --- | --- | --- |
|  | **From neonates to 1yr olds** | **From 1yr to 2yr olds** |
| **Increase** | | PreC-R | Prt-I-L | | --- | --- | | PreC-L | SMargl-R | | Frt-I-Ob-L | SMargl-L | | Rolandic-R | Angular-R | | Rolandic-L | Precuneus-R | | **SMA-R** | Precuneus-L | | Rectus-R | ParaC-R | | Cg-M-R | Pallidum-R | | Cg-M-L | Thalamus-R | | Cg-P-R | Heschl-R | | Cg-P-L | Heschl-L | | Hpcmp-R | Temp-S-R | | Hpcmp-L | Temp-S-L | | ParaHpcmp-R | Temp-P-S-R | | ParaHpcmp-L | Temp-P-S-L | | Amygdala-R | Temp-M-R | | Amygdala-L | Temp-M-L | | Occpt-S-L | Temp-P-M-R | | Fusiform-R | Temp-P-M-L | | PosC-L | Temp-I-R | | Prt-I-R | Temp-I-L | | | Frt-S-Ob-R | | --- | | Frt-M-Ob-L | | | **Frt-S-M-R** | | | **Cg-P-R** | | | **Cg-P-L** | | |
| **Decrease** | | **Caudate-R** | | --- | | **Caudate-L** | | Putamen-L | | | **Rolandic-L** | | --- | | ParaHpcmp-L | | Lingual-R | | **Caudate-R** | | **Caudate-L** | | Heschl-R | | Temp-S-R | | Temp-P-S-L | | Temp-M-R | | Temp-P-M-R | |

The brain regions highlighted in red indicate a concurrent increase of GE/MD/degree while brain regions with concurrent decreases of GE/MD/degree are marked in blue.
